# Supplementary material for: Antibacterial Activity of Pharmaceutical-Grade Rose Bengal: An Application of a Synthetic Dye in Antibacterial Therapies
Source: MDPI journal article supplement (doi:10.3390/molecules27010322), 2022-01-05
Supplement: s1 [file s1]

## Supporting Information

Article

# Antibacterial Activity of Pharmaceutical-Grade Rose Bengal: An Application of a Synthetic Dye in Antibacterial Therapies

Michio Kurosu <sup>1,\*</sup>, Katsuhiko Mitachi <sup>1</sup>, Junshu Yang <sup>2</sup>, Edward V. Pershing <sup>3</sup>, Bruce D. Horowitz <sup>3</sup>, Eric A. Wachter <sup>3</sup>, John W. Lacey, III <sup>3</sup>, Yinduo Ji <sup>2</sup> and Dominic J. Rodrigues <sup>3</sup>

<sup>1</sup> Department of Pharmaceutical Sciences, College of Pharmacy, University of Tennessee Health Science Center, 881 Madison Avenue, Memphis, TN 38163, USA; kmitachi@uthsc.edu

<sup>2</sup> Department of Veterinary and Biomedical Sciences, University of Minnesota, 205 VSB, 1971 Commonwealth Avenue, St. Paul, MN 55108, USA; yang1181@umn.edu (J.Y.); jixxx002@umn.edu (Y.J.)

<sup>3</sup> Provectus Biopharmaceuticals, Inc., 10025 Investment Drive, Suite 250, Knoxville, TN 37932, USA; epershing@pershingenterprises.com (E.V.P.); bhorowitz@pvct.com (B.D.H.); wachter@pvct.com (E.A.W.); jlacey@utmck.edu (J.W.L.III); rodrigues@pvct.com (D.J.R.)

\* Correspondence: mkurosu@uthsc.edu; Tel.: +1-901-448-1045

### Table of Contents

|                                                                                        |    |
|----------------------------------------------------------------------------------------|----|
| Antibiotics .....                                                                      | S2 |
| Cytotoxicity assays .....                                                              | S3 |
| Date for whole-genome sequencing of a PV-10 resistant <i>M. smegmatis</i> (ATTCC607™)— | S4 |
| References .....                                                                       | S4 |

### Antibiotics

All antibiotics were purchased from commercial sources (amikacin disulfate salt (Sigma Aldrich, A1774-1G), capreomycin sulfate (Sigma Aldrich, C4142-1G), ciprofloxacin hydrochloride monohydrate (TCI, C2227), ethionamide (TCI, E0695), isoniazid (Sigma Aldrich, I3377-5G), linezolid (Chem-Impex, 29723), meropenem trihydrate (Ark Pharm, AK161987), rifampicin (Sigma Aldrich, R3501-1G)) and used without further purification unless otherwise noted. APPB (aminouridyl phenoxypiperidinylbenzyl butanamide) was synthesized according to the reported procedure. [74,75]

### Cytotoxicity of PV-10 under light

Cytotoxicity assays for PV-10 in Vero cells were performed in a 24-well plate. Into each well (1 mL medium/well), 1  $\mu$ L of drug concentration was added. After 1, 2, 3 and 4 h of incubation with drugs under the fluorescent light at r.t., the medium was removed and the cell was washed with PBS (x3). Images were collected by AMG EVOS xl transmitted light imaging microscope. After adding the medium (1 mL/well), 10  $\mu$ L of MTT solution (5 mg/mL in PBS) was added and incubated for another 3 h at 37  $^{\circ}$ C (5% CO<sub>2</sub>). The medium was removed, and DMSO (1 mL/well) was added. Viability was assessed on the basis of cellular conversion of MTT into a purple formazan product. The absorbance of the colored formazan product was measured at 570 nm by a BioTek Synergy HT Spectrophotometer.

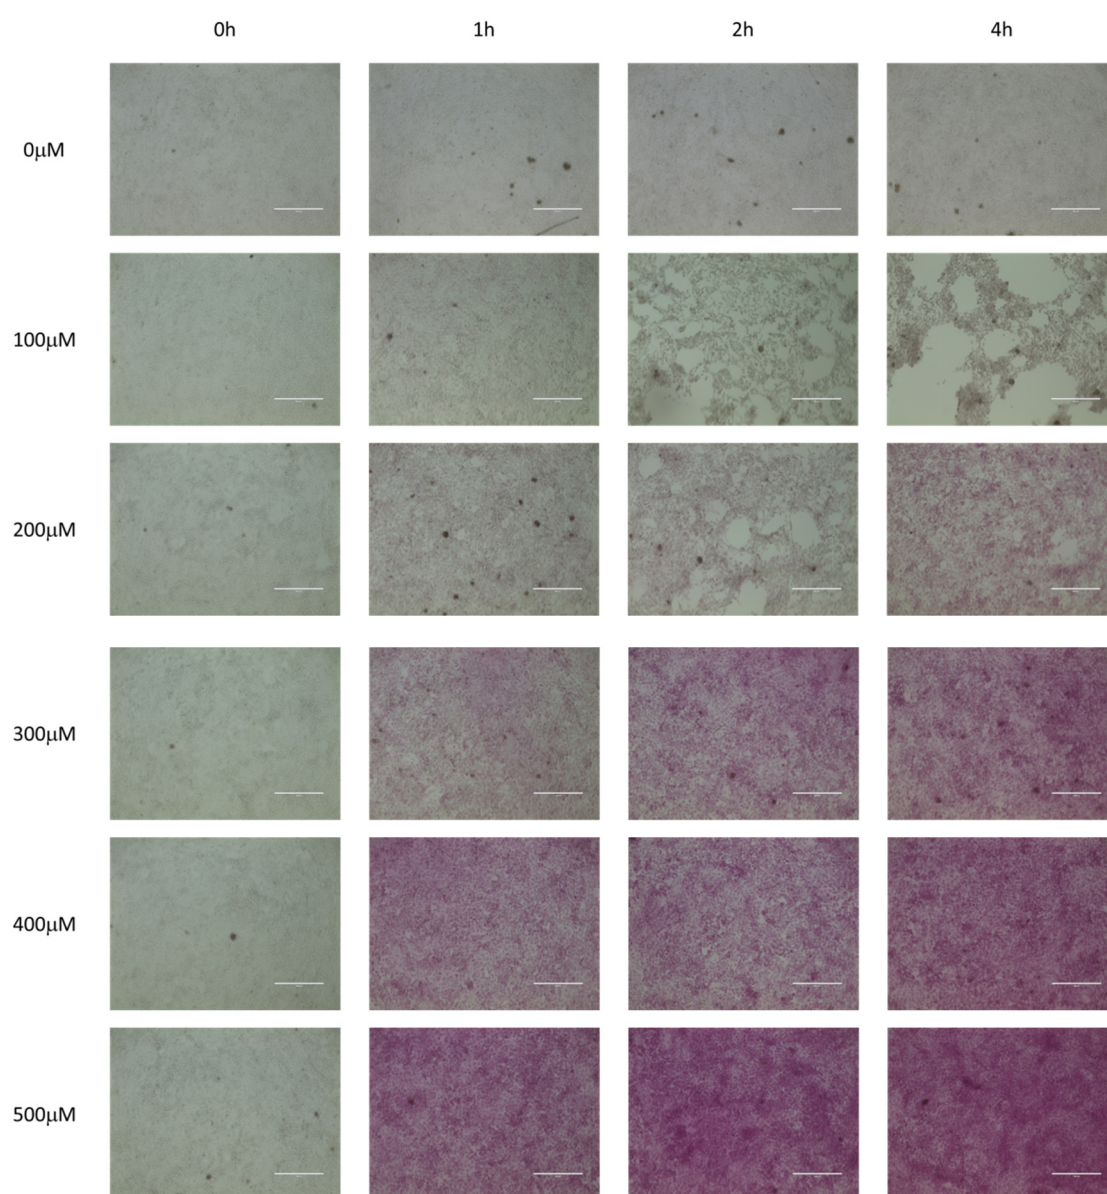

**Figure S1.** Top view images of Vero cells after PV-10 treatment. Scale bar = 400  $\mu$ m.

## Whole-genome sequencing of *M. smegmatis* strains

The procedure was described in the text (see section 3.11).

**Table S1.** The list of SNPs of *M. smegmatis* ATCC607 and its PV-10 resistant strain using *M. smegmatis* strain FDAARGOS\_679 as a reference.

| CHROM         | POS     | TYPE    | REF      | ALT          | EVIDENCE            | NT_POS | AA_POS | EFFECT                          | GENE           | PRODUCT                                                                        |
|---------------|---------|---------|----------|--------------|---------------------|--------|--------|---------------------------------|----------------|--------------------------------------------------------------------------------|
| NZ_CP054795.1 | 86860   | snp     | C        | T            | T:55 C:0            |        |        | Nonsense                        |                |                                                                                |
| NZ_CP054795.1 | 150471  | ins     | T        | C            | C:74 T:0            |        |        | Nonsense                        |                |                                                                                |
| NZ_CP054795.1 | 165620  | del     | GC       | G            | G:44 GC:0           |        |        | Nonsense                        |                |                                                                                |
| NZ_CP054795.1 | 179417  | snp     | C        | G            | G:94 C:0            |        | 430    | GGG>GCG (Gly > Ala)             | WP_011727516.1 | UF2786 domain-containing protein                                               |
| NZ_CP054795.1 | 209774  | ins     | C        | CCTGGATGG    | CCTGGATGG:29 C:0    |        |        | Nonsense                        |                |                                                                                |
| NZ_CP054795.1 | 252826  | snp     | T        | A            | A:100 T:0           |        |        | Nonsense                        |                |                                                                                |
| NZ_CP054795.1 | 278313  | snp     | A        | G            | G:79 A:0            |        |        | GAT>GGT (Asp>Gly)               | FOB87_RS01265  | isopenicillin N synthase family oxygenase                                      |
| NZ_CP054795.1 | 655132  | snp     | C        | T            | T:98 C:0            |        |        | Nonsense                        | FOB87_RS01335  | hypothetical protein                                                           |
| NZ_CP054795.1 | 697388  | complex | TCGC     | CCGT         | CCGT:6 TCGC:0       |        |        | Nonsense                        |                |                                                                                |
| NZ_CP054795.1 | 697398  | snp     | A        | T            | T:5 A:0             |        |        | Nonsense                        |                |                                                                                |
| NZ_CP054795.1 | 750438  | ins     | C        | CG           | CG:69 C:1           |        |        | CCG>CCGG                        | FOB87_RS03560  | hypothetical / 750,139..750,539                                                |
| NZ_CP054795.1 | 807713  | del     | TC       | T            | T:74 TC:0           |        |        | Reading frame shift             | FOB87_RS03885  | molybdopter-in-dependent oxidoreductase                                        |
| NZ_CP054795.1 | 848667  | snp     | G        | A            | A:107 G:0           |        |        | GGG>GAG (Gly>Glu)               | FOB87_RS04025  | hypothetical protein                                                           |
| NZ_CP054795.1 | 1278355 | snp     | T        | C            | C:102 T:0           |        |        | TGG > CCG ( Trp>Arg)            | FOB87_RS06100  | nuclear transport factor 2 family protein                                      |
| NZ_CP054795.1 | 1314943 | del     | CG       | C            | C:92 CG:0           |        |        | Reading frame shift             | FOB87_RS06275  | glycosyltransferase family 4 protein                                           |
| NZ_CP054795.1 | 1322630 | snp     | T        | C            | C:87 T:1            |        |        | GTC > GCC (Val > Ala)           | FOB87_RS06315  | 1-acyl-sn-glycerol-3-phosphate acyltransferase                                 |
| NZ_CP054795.1 | 2450878 | snp     | A        | G            | G:91 A:0            |        |        | ATC > GTC (Ile > Val)           | FOB87_RS11910  | MMPL family transporter                                                        |
| NZ_CP054795.1 | 2463927 | snp     | A        | G            | G:100 A:0           |        |        | Nonsense                        |                |                                                                                |
| NZ_CP054795.1 | 2471229 | del     | GC       | G            | G:57 GC:0           |        |        | Reading frame shift             | FOB87_RS12000  | diacylglycerol kinase                                                          |
| NZ_CP054795.1 | 2573215 | snp     | C        | G            | G:71 C:0            |        |        | nonsense                        |                |                                                                                |
| NZ_CP054795.1 | 2624938 | snp     | C        | T            | T:95 C:0            |        |        | TGC > TAC (Cys > Tyr)           | FOB87_RS12715  | carboxylesterase/lipase family protein                                         |
| NZ_CP054795.1 | 2636871 | ins     | A        | AC           | AC:81 A:0           |        |        | Reading frame shift             | FOB87_RS12770  | hypothetical protein                                                           |
| NZ_CP054795.1 | 2646805 | complex | GAT      | CGTC         | CGTC:62 GAT:0       |        |        | Reading frame shift             | FOB87_RS12830  | DeoX/GlpK family DNA-binding transcription regulator                           |
| NZ_CP054795.1 | 3057956 | snp     | G        | C            | C:98 G:0            |        |        | CGG > CCG (Arg > Pro)           | FOB87_RS14690  | lclR family transcriptional regulator                                          |
| NZ_CP054795.1 | 3199404 | snp     | G        | A            | A:96 G:0            |        |        | CGC > TGC (Arg > Cys)           | murG           | undecaprenyldiphospho-muramylpentapeptide beta-N-acetylglucosaminyltransferase |
| NZ_CP054795.1 | 3231329 | snp     | A        | G            | G:98 A:0            |        |        | CTG > CCG (Ileu > Pro)          | ripC           | peptidoglycan hydrolase RipC                                                   |
| NZ_CP054795.1 | 3324335 | snp     | A        | G            | G:72 A:0            |        |        | ACG > GCG (Thr > Ala)           | FOB87_RS15940  | lipopolysaccharide assembly protein LapA domain-containing protein             |
| NZ_CP054795.1 | 3388812 | ins     | T        | TCGAGCGCGC   | TCGAGCGCGC:78 T:4   |        |        | (Leu Asp > Leu Gly Ala Leu Asp) | FOB87_RS18520  | MBL fold metallo-hydrolase                                                     |
| NZ_CP054795.1 | 4082258 | ins     | T        | TG           | TG:104 T:0          |        |        | Reading frame shift at His71    | rsaA           | anti-sigma E factor RsaA                                                       |
| NZ_CP054795.1 | 4087930 | snp     | G        | C            | C:95 G:0            |        |        | AAG > AAC (Lys > Asn)           | FOB87_RS19475  | isoprenylcysteine carboxylmethyltransferase family protein                     |
| NZ_CP054795.1 | 4152291 | snp     | A        | G            | G:77 A:0            |        |        | CTC > CCC (Leu > Pro)           | FOB87_RS19770  | nitrate reductase subunit alpha                                                |
| NZ_CP054795.1 | 4307456 | snp     | A        | G            | G:86 A:0            |        |        | CAC > CGC (His > Arg)           | FOB87_RS20560  | sensor histidine kinase                                                        |
| NZ_CP054795.1 | 4442430 | snp     | T        | C            | C:78 T:0            |        |        | TAT > CAT (Tyr > His)           | FOB87_RS21235  | aminodeoxychorismate synthase component I                                      |
| NZ_CP054795.1 | 4467112 | snp     | A        | G            | G:75 A:0            |        |        | CGA > CGG (nonsense)            | FOB87_RS21365  | 5-formyltetrahydrofolate cyclo-ligase                                          |
| NZ_CP054795.1 | 4838982 | snp     | C        | T            | T:97 C:0            |        |        | Nonsense                        |                |                                                                                |
| NZ_CP054795.1 | 4853649 | del     | CG       | C            | C:100 CG:0          |        |        | Reading frame shift             | FOB87_RS23335  | D-alanyl-D-alanine dipeptidase                                                 |
| NZ_CP054795.1 | 5060448 | del     | GC       | G            | G:74 GC:0           |        |        | Reading frame shift             | FOB87_RS24340  | helix-turn-helix domain-containing protein                                     |
| NZ_CP054795.1 | 5101901 | snp     | A        | G            | G:105 A:0           |        |        | GTC > GCC (Val > Ala)           | FOB87_RS24550  | LysR family transcriptional regulator                                          |
| NZ_CP054795.1 | 5205070 | snp     | T        | C            | C:97 T:0            |        |        | Nonsense                        |                |                                                                                |
| NZ_CP054795.1 | 5314448 | snp     | T        | G            | G:82 T:0            |        |        | TGA > TGC (M > Cys)             | FOB87_RS25575  | ABC transporter substrate-binding protein                                      |
| NZ_CP054795.1 | 5393330 | del     | GCCGAAAG | G            | G:50 GCCGAAAG:0     |        |        | Nonsense                        |                |                                                                                |
| NZ_CP054795.1 | 5717293 | ins     | G        | GCACCT       | GCACCT:71 G:0       |        |        | Reading frame shift at Gly14    | FOB87_RS27580  | aquaporin family protein                                                       |
| NZ_CP054795.1 | 5718323 | del     | ACGG     | A            | A:62 ACGG:0         |        |        | GACGGC > GAC (AspGly>Asp)       | glpK           | glycerol kinase GlpK                                                           |
| NZ_CP054795.1 | 5719371 | ins     | A        | ACATCCTCGGCG | ACATCCTCGGCG:78 T:4 |        |        | Plms                            | glpK           | glycerol kinase GlpK                                                           |
| NZ_CP054795.1 | 5906171 | snp     | C        | T            | T:103 C:0           |        |        | GCC > GTC (Ala > Asp)           | recF           | DNA replication/repair protein RecF                                            |
| NZ_CP054795.1 | 5906160 | snp     | A        | G            | G:81 A:0            |        |        | GAC>GGC (Asp>Gly)               | FOB87_RS28670  | hypothetical protein                                                           |
| NZ_CP054795.1 | 5990384 | snp     | G        | C            | C:78 G:1            |        |        | CGG>CCG (Arg>Pro)               | FOB87_RS28785  | AAA family ATPase                                                              |
| NZ_CP054795.1 | 6193206 | snp     | A        | G            | G:70 A:0            |        |        | SD region                       | fadD4          | fatty acid-CoA ligase fadD4                                                    |
| NZ_CP054795.1 | 6229390 | snp     | T        | C            | C:73 T:0            |        |        | CGA>CGG(nonsense)               | FOB87_RS29915  | ferredoxin-NADP reductase                                                      |
| NZ_CP054795.1 | 6523244 | snp     | A        | G            | G:90 A:0            |        |        | GTC>GCC (Val>Ala)               | FOB87_RS31090  | Crp/Fnr family transcriptional regulator                                       |
| NZ_CP054795.1 | 6551108 | snp     | C        | T            | T:59 C:0            |        |        | CCG>CCA(nonsense)               | FOB87_RS31245  | MSMEG_0570 family nitrogen starvation response protein                         |
| NZ_CP054795.1 | 6631566 | snp     | A        | G            | G:102 A:0           |        |        | Nonsense                        |                |                                                                                |
| NZ_CP054795.1 | 6673578 | snp     | C        | A            | A:98 C:0            |        |        | CGG>CTG(Arg>Leu)                | FOB87_RS31805  | xanthine dehydrogenase family protein molybdopter-in-binding subunit           |
| NZ_CP054795.1 | 6735495 | ins     | G        | GC           | GC:92 G:0           |        |        | Reading frame shift             | FOB87_RS32090  | XdhC family protein                                                            |
| NZ_CP054795.1 | 6836559 | snp     | A        | T            | T:82 A:0            |        |        | TAC>AAC(Tyr>Asn)                | FOB87_RS32600  | Na <sup>+</sup> /H <sup>+</sup> antiporter subunit A                           |
| NZ_CP054795.1 | 6844102 | snp     | G        | A            | A:56 G:0            |        |        | Nonsense                        |                |                                                                                |
| NZ_CP054795.1 | 6846422 | snp     | G        | T            | T:101 G:0           |        |        | GCG>GAG (Ala>Glu)               | FOB87_RS32655  | AAA family ATPase                                                              |
| NZ_CP054795.1 | 6893010 | snp     | T        | C            | C:88 T:0            |        |        | TGG>CGG(Trp>Arg)                | FOB87_RS32850  | DUF779 domain-containing protein                                               |
| NZ_CP054795.1 | 6943702 | snp     | T        | C            | C:82 T:0            |        |        | SD region                       | FOB87_RS33150  | MspA family porin                                                              |

## References

- 74 Mitachi, K.; Yun, H.-G.; Kurosu, S. M.; Eslamimehr, S.; Lemieux, M. R.; Klaić, L.; Clemons, W. M.; Kurosu, M. Novel FR-900493 Analogues That Inhibit the Outgrowth of *Clostridium difficile* Spores. *ACS Omega* **2018**, *3*, 1726–1739.
- 75 Mitachi, K.; Kurosu, S. M.; Gillman, C. D.; Yun, H. G.; Clemons, W. M.; Kurosu, M. A practical synthesis of a novel DPAGT1 inhibitor, aminouridyl phenoxypiperidinbenzyl butanamide (APPB) for in vivo studies. *MethodsX* **2019**, *6*, 2305–2321.
